# Supplementary material for: Weird, witty and worthwhile: Exploring the benefits of mnemonic- based medical education
Source: Research Square preprint supplement (doi:10.21203/rs.3.rs-5595921/v1), 2024-12-20
Supplement: Supplementary file 1 [file 8cbc99dbf88585f386aea8a9.xlsx]

## Sheet: Analysis
Session number	Student	Previous sessions attended	Pre-session mnemonic question 1	Post-session mnemonic question 1	Mnemonic change 1	Mnemonic type 1	Utility of mnemonic 1	Pre-session mnemonic question 2	Post-session mnemonic question 2	Mnemonic change 2	Mnemonic type 2	Utility of mnemonic 2	Pre-session mnemonic question 3	Post-session mnemonic question 3	Mnemonic change 3	Mnemonic type 3	Utility of mnemonic 3	Pre-session mnemonic question 4	Post-session mnemonic question 3	Mnemonic change 4	Mnemonic type 3	Utility of mnemonic 3	Pre-session mnemonic question 5	Post-session mnemonic question 5	Mnemonic change 5	Mnemonic type 5	Utility of mnemonic 5	Average mnemonic pre session score	Average mnemonic post session score	Average mnemonic change	Average mnemonic utility	Pre-session non-mnemonic question 1	Post-session non-mnemonic question 1	Non-mnemonic change 1	Pre-session non-mnemonic question 2	Post-session non-mnemonic question 2	Non-mnemonic change 2	Pre-session non-mnemonic question 3	Post-session non-mnemonic question 3	Non-mnemonic change 3	Pre-session non-mnemonic question 4	Post-session non-mnemonic question 4	Non-mnemonic change 4	Pre-session non-mnemonic question 5	Post-session non-mnemonic question 5	Non-mnemonic change 5	Average non-mnemonic pre-session	Average non-mnemonic post-session	Non-mnemonic average change
1	A		1	1	0	Acronym	4	1	1	0	Acronym	5																1	1	0	4.5	0	1	1	1	1	0										0.5	1	0.5
1	B		0	1	1	Acronym	4	1	1	0	Acronym	4																0.5	1	0.5	4	0	1	1	1	1	0										0.5	1	0.5
1	C		1	0	-1	Acronym	3	1	1	0	Acronym	5																1	0.5	-0.5	4	1	1	0	0	0	0										0.5	0.5	0
1	D		1	1	0	Acronym	5	1	1	0	Acronym	5																1	1	0	5	1	1	0	1	1	0										1	1	0
1	E		1	1	0	Acronym	4	1	1	0	Acronym	4																1	1	0	4	1	1	0	1	1	0										1	1	0
1	F		1	1	0	Acronym	5	1	1	0	Acronym	5																1	1	0	5	1	1	0	1	1	0										1	1	0
1	G		1	1	0	Acronym	4	1	1	0	Acronym	4																1	1	0	4	1	1	0	0	1	1										0.5	1	0.5
2	A		0	1	1	Acronym	4	0	1	1	Rhyme	4	0	0	0													0	0.666667	0.666667	4.16667	1	1	0	0	0	0	0	0	0	0	0	0	0	0	0	0.2	0.2	0
2	B		0	1	1	Acronym	3	1	1	0	Rhyme	5	0	0	0													0.333333	0.666667	0.333333	3.33333	1	1	0	0	0	0	0	0	0	0	0	0	0	0	0	0.2	0.2	0
2	C		1	1	0	Acronym	5	1	1	0	Rhyme	5	0	0	0													0.666667	0.666667	0	4.5	1	1	0	1	1	0	0	0	0	0	0	0	0	0	0	0.4	0.4	0
2	D		0	1	1	Acronym	5	0	1	1	Rhyme	5	0	0	0													0	0.666667	0.666667	5	0	1	1	0	1	1	0	0	0	0	0	0	0	0	0	0	0.4	0.4
2	E		1	1	0	Acronym	5	1	1	0	Rhyme	5	0	1	1													0.666667	1	0.333333	4.33333	0	1	1	1	1	0	0	0	0	0	0	0	0	0	0	0.2	0.4	0.2
3	A		1	1	0	Acronym	5	1	1	0	Acronym	5	0	0	0	Acronym	3											0.666667	0.666667	0	4.33333	1	1	0	1	0	-1										1	0.5	-0.5
3	B		1	1	0	Acronym	5	1	1	0	Acronym	5	0	1	1	Acronym	5											0.666667	1	0.333333	5	1	1	0	0	0	0										0.5	0.5	0
3	C		0	1	1	Acronym	5	1	1	0	Acronym	5	1	1	0	Acronym	5											0.666667	1	0.333333	5	0	0	0	0	0	0										0	0	0
3	D		1	1	0	Acronym	5	0	1	1	Acronym	5	0	1	1	Acronym	2											0.333333	1	0.666667	4	1	1	0	0	1	1										0.5	1	0.5
3	E		1	0	-1	Acronym	3	0	1	1	Acronym	5	0	1	1	Acronym	5											0.333333	0.666667	0.333333	4.33333	1	1	0	0	1	1										0.5	1	0.5
4	A	0	0	0	0	Acronym	4	0	0	0	Acronym	4	0	0	0	Acronym	4	0	0	0	Connections	4						0	0	0	4	1	0	-1	0	0	0										0.5	0	-0.5
4	B	0	0	1	1	Acronym	3	1	0	-1	Acronym	3	0	0	0	Acronym	5	1	1	0	Connections	5						0.5	0.5	0	4	1	1	0	0	1	1										0.5	1	0.5
4	C	0	0	0	0	Acronym	4	1	0	-1	Acronym	3	1	1	0	Acronym	5	1	1	0	Connections	3						0.75	0.5	-0.25	3.75	0	0	0	0	1	1										0	0.5	0.5
4	D	1	0	1	1	Acronym	4	0	1	1	Acronym	4	0	1	1	Acronym	4	0	1	1	Connections	4						0	1	1	4	0	1	1	0	1	1										0	1	1
4	E	0	1	1	0	Acronym	5	0	1	1	Acronym	4	1	1	0	Acronym	5	0	1	1	Connections	5						0.5	1	0.5	4.75	0	1	1	1	1	0										0.5	1	0.5
5	A	2	0	0	0	Acronym	4	1	1	0	Acronym	5																0.5	0.5	0	4.5	1	1	0	1	1	0	1	1	0	1	1	0	1	1	0	1	1	0
5	B	1	0	0	0	Acronym	5	1	1	0	Acronym	5																0.5	0.5	0	5	1	0	-1	1	1	0	1	0	-1	1	0	-1	1	0	-1	1	0.2	-0.8
5	C	0	0	1	1	Acronym	5	1	1	0	Acronym	5																0.5	1	0.5	5	1	1	0	0	1	1	0	1	1	0	1	1	0	1	1	0.2	1	0.8
5	D	3	0	0	0	Acronym	5	1	1	0	Acronym	5																0.5	0.5	0	5	1	1	0	0	1	1	1	1	0	1	1	0	1	1	0	0.8	1	0.2
5	E	1	1	1	0	Acronym	3	1	1	0	Acronym	4																1	1	0	3.5	1	1	0	1	1	0	0	0	0	0	0	0	0	0	0	0.4	0.4	0
6	A	3	1	0	-1	Acronym		0	1	1	Acronym	5	0	1	1	Acronym		0	0	0	Connections	5						0.25	0.5	0.25	5	1	1	0	0	0	0										0.5	0.5	0
6	B	0	1	0	-1	Acronym		1	1	0	Acronym	5	1	1	0	Acronym		0	0	0	Connections	5						0.75	0.5	-0.25	4.8	0	0	0	1	0	-1										0.5	0	-0.5
6	C	0	1	1	0	Acronym		1	1	0	Acronym	5	1	1	0	Acronym		1	1	0	Connections	5						1	1	0	4.6	0	1	1	1	1	0										0.5	1	0.5
6	D	1	0	1	1	Acronym		1	1	0	Acronym	5	0	1	1	Acronym		0	1	1	Connections	5						0.25	1	0.75	4.8	0	1	1	0	1	1										0	1	1
7	A	4	0	1	1	Acronym	5	0	0	0	Imagery		1	1	0	Acronym	5											0.333333	0.666667	0.333333	5	0	0	0	0	0	0	0	0	0							0	0	0
7	B	1	0	1	1	Acronym	4	0	1	1	Imagery		1	1	0	Acronym	4											0.333333	1	0.666667	4	0	0	0	1	0	-1	0	0	0							0.333333	0	-0.333333
7	C	0	1	1	0	Acronym	5	1	1	0	Imagery		1	1	0	Acronym	5											1	1	0	5	1	1	0	1	1	0	1	1	0							1	1	0
7	D	1	0	1	1	Acronym	5	1	1	0	Imagery		1	1	0	Acronym	5											0.666667	1	0.333333	5	0	1	1	0	1	1	1	1	0							0.333333	1	0.666667
7	E	5	1	1	0	Acronym	5	1	1	0	Imagery		1	1	0	Acronym	5											1	1	0	5	1	1	0	0	1	1	0	1	1							0.333333	1	0.666667
8	A	0	0	0	0	Acronym	5	1	1	0	Acronym	5	0	0	0	Acronym	5	1	1	0	Associations		1	1	0	Acronym	5	0.6	0.6	0	5	0	0	0													0	0	0
8	B	5	0	0	0	Acronym	4	1	1	0	Acronym	5	1	1	0	Acronym	4	0	0	0	Associations		0	0	0	Acronym	4	0.4	0.4	0	4.25	0	0	0													0	0	0
8	C	2	0	0	0	Acronym	5	1	1	0	Acronym	4	0	0	0	Acronym	5	0	0	0	Associations		1	1	0	Acronym	5	0.4	0.4	0	4.75	0	0	0													0	0	0
8	D	1	0	0	0	Acronym	3	1	1	0	Acronym	2	0	0	0	Acronym	1	1	1	0	Associations		1	1	0	Acronym	3	0.6	0.6	0	2.25	0	0	0													0	0	0
8	E	0	1	1	0	Acronym	4	1	1	0	Acronym	5	1	1	0	Acronym	4	1	1	0	Associations		0	0	0	Acronym	3	0.8	0.8	0	4	0	0	0													0	0	0
8	F	0	0	1	1	Acronym	4	1	1	0	Acronym	4	1	1	0	Acronym	4	0	1	1	Associations		1	1	0	Acronym	4	0.6	1	0.4	4	0	1	1													0	1	1
8	G	5	1	0	-1	Acronym	4	1	1	0	Acronym	3	1	1	0	Acronym	2	1	1	0	Associations		1	1	0	Acronym	2	1	0.8	-0.2	2.75	1	1	0													1	1	0
9	A	2	0	1	1	Associations	4																					0	1	1	4.5	1	0	-1	1	1	0	0	1	1	0	1	1	0	0	0	0.4	0.6	0.2
9	B	1	0	1	1	Associations	3																					0	1	1	3.5	0	1	1	0	1	1	0	1	1	0	0	0	0	0	0	0	0.6	0.6
9	C	7	0	1	1	Associations	5																					0	1	1	4	0	1	1	0	0	0	1	1	0	0	1	1	0	1	1	0.2	0.8	0.6
10	A	1	1	1	0	Acronym	3	0	0	0	Acronym	3	1	0	-1	Acronym	3											0.666667	0.333333	-0.333333	3.4
10	B	1	1	1	0	Acronym	5	1	1	0	Acronym	5	0	0	0	Acronym	5											0.666667	0.666667	0	5
11	A	1	1	1	0	Associations	5	0	0	0	Acronym	3	1	0	-1	Acronym	5											0.666667	0.333333	-0.333333	4.5	0	0	0	1	1	0	1	1	0							0.666667	0.666667	0
11	B	3	1	1	0	Associations	3	0	0	0	Acronym	3	0	1	1	Acronym	3											0.333333	0.666667	0.333333	3	0	0	0	1	1	0	0	1	1							0.333333	0.666667	0.333333
11	C	2	1	1	0	Associations	5	1	1	0	Acronym	5	0	0	0	Acronym	5											0.666667	0.666667	0	5	0	1	1	1	1	0	1	1	0							0.666667	1	0.333333
11	D	3	1	1	0	Associations	4	0	0	0	Acronym	4	1	1	0	Acronym	4											0.666667	0.666667	0	4.25	1	1	0	0	1	1	1	1	0							0.666667	1	0.333333
11	E	2	0	0	0	Associations	5	0	0	0	Acronym	5	0	1	1	Acronym	3											0	0.333333	0.333333	4.5	0	0	0	0	1	1	1	0	-1							0.333333	0.333333	0
11	F	1	1	1	0	Associations	5	1	1	0	Acronym	5	0	0	0	Acronym	5											0.666667	0.666667	0	4.25	1	1	0	1	1	0	1	1	0							1	1	0
11	G	0	1	1	0	Associations	3	0	0	0	Acronym	5	0	0	0	Acronym	5											0.333333	0.333333	0	4.5	0	0	0	1	1	0	0	0	0							0.333333	0.333333	0
12	A	3	0	1	1	Acronym	5	0	1	1	Acronym	4	1	1	0	Acronym	4	1	1	0	Acronym	4						0.5	1	0.5	4.25	0	1	1	0	1	1										0	1	1
12	B	4	0	1	1	Acronym	3	0	1	1	Acronym	4	1	1	0	Acronym	3	1	1	0	Acronym	3						0.5	1	0.5	3.25	0	1	1	0	1	1										0	1	1
12	C	2	0	1	1	Acronym	4	0	0	0	Acronym	4	1	1	0	Acronym	4	0	1	1	Acronym	3						0.25	0.75	0.5	3.75	0	1	1	0	0	0										0	0.5	0.5
13	A	0	0	0	0	Acronym	4	1	1	0	Acronym	3	0	0	0	Acronym	3											0.333333	0.333333	0	3.33333	1	0	-1	1	0	-1		1	1							1	0.333333	-0.666667
13	B	3	0	0	0	Acronym	3	1	1	0	Acronym	3	1	1	0	Acronym	3											0.666667	0.666667	0	3	1	0	-1	0	0	0		0	0							0.5	0	-0.5
13	C	0	0	1	1	Acronym	3	1	1	0	Acronym	3	1	1	0	Acronym	3											0.666667	1	0.333333	3	0	1	1	1	1	0		1	1							0.5	1	0.5
13	D	1	0	1	1	Acronym	4	0	1	1	Acronym	4	0	1	1	Acronym	4											0	1	1	4	0	1	1	0	1	1	0	1	1							0	1	1
13	E	0	0	1	1	Acronym	4	0	1	1	Acronym	3	0	1	1	Acronym	4											0	1	1	3.66667	0	1	1	0	1	1	0	0	0							0	0.666667	0.666667
13	F	0	1	1	0	Acronym	2	1	1	0	Acronym	3	1	1	0	Acronym	3											1	1	0	2.66667	0	0	0	0	0	0	1	1	0							0.333333	0.333333	0
13	G	1	1	1	0	Acronym	5	1	1	0	Acronym	5	0	1	1	Acronym	5											0.666667	1	0.333333	5	0	1	1	1	1	0	1	1	0							0.666667	1	0.333333
13	H	2	0	1	1	Acronym	4	0	1	1	Acronym	4	1	1	0	Acronym	4											0.333333	1	0.666667	4	1	1	0	1	1	0	0	0	0							0.666667	0.666667	0
13	I	1	1	1	0	Acronym	5	1	1	0	Acronym	5	1	1	0	Acronym	5											1	1	0	5	0	1	1	0	1	1	1	1	0							0.333333	1	0.666667
13	J	1	0	1	1	Acronym	4	0	1	1	Acronym	4	1	1	0	Acronym	4											0.333333	1	0.666667	4	1	0	-1	0	0	0	1	1	0							0.666667	0.333333	-0.333333
13	K	2	0	1	1	Acronym	5	1	1	0	Acronym	4	0	0	0	Acronym	4											0.333333	0.666667	0.333333	4.33333	0	1	1	0	1	1	1	1	0							0.333333	1	0.666667
13	L	3	0	1	1	Acronym	5	0	1	1	Acronym	3	0	1	1	Acronym	3											0	1	1	3.66667	0	1	1	0	1	1	1	1	0							0.333333	1	0.666667
13	M	0	0	1	1	Acronym	5	1	1	0	Acronym	4	0	1	1	Acronym	4											0.333333	1	0.666667	4.33333	0	1	1	1	1	0	0	0	0							0.333333	0.666667	0.333333
13	N	0	1	1	0	Acronym	2	1	1	0	Acronym	5	1	1	0	Acronym	5											1	1	0	4	1	1	0	1	1	0	1	1	0							1	1	0
13	O	0	1	0	-1	Acronym	5	1	0	-1	Acronym	5	1	1	0	Acronym	4											1	0.333333	-0.666667	4.66667	0	0	0	0	0	0	1	1	0							0.333333	0.333333	0
13	P	10	0	1	1	Acronym	5	0	1	1	Acronym	3	0	1	1	Acronym	4											0	1	1	4	0	1	1	0	1	1	0	0	0							0	0.666667	0.666667
13	Q	1	1	1	0	Acronym	5	1	1	0	Acronym	5	1	1	0	Acronym	5											1	1	0	5	0	1	1	1	1	0	1	1	0							0.666667	1	0.333333
13	R	5	1	1	0	Acronym	5	0	1	1	Acronym	5	1	1	0	Acronym	3											0.666667	1	0.333333	4.33333	1	1	0	1	1	0	1	1	0							1	1	0
14	A	1	1	1	0	Rhyme	5																					1	1	0	5	1	1	0	1	1	0										1	1	0
15	A	4	1	1	0	Acronym	4	1	1	0	Imagery	3	1	1	0	Association												1	1	0	4	0	1	1	1	1	0	1	1	0							0.666667	1	0.333333
15	B	5	1	1	0	Acronym	5	1	1	0	Imagery	5	1	1	0	Association												1	1	0	5	1	1	0	0	1	1	1	1	0							0.666667	1	0.333333
15	C	2	1	1	0	Acronym	3	0	0	0	Imagery	5	0	0	0	Association												0.333333	0.333333	0	4.5	1	1	0	0	1	1	1	1	0							0.666667	1	0.333333
15	D	3	1	1	0	Acronym	5	0	0	0	Imagery	5	1	1	0	Association												0.666667	0.666667	0	5	1	1	0	1	1	0	1	1	0							1	1	0
15	E	1	1	1	0	Acronym	4	1	1	0	Imagery	4	1	1	0	Association												1	1	0	4.25	1	1	0	1	1	0	1	1	0							1	1	0
16	A	1		1		Acronym	5		1		Imagery	5																	1		5		1			1			1			0						0.75
16	B	2		1		Acronym	4		1		Imagery	4																	1		4		1			1			1			1						1
16	C	3		1		Acronym	4		0		Imagery	3																	0.5		4		1			1			0			0						0.5
17	A	3		1		Acronym	5		1		Connections	5																	1		5		1															1
17	B	0		1		Acronym	3		1		Connections	5																	1		4		0															0
17	C	0		1		Acronym	3		1		Connections	4																	1		3.5		1															1
17	D	3		1		Acronym	5		1		Connections	5																	1		5		1															1
17	E	2		0		Acronym	5		1		Connections	5																	0.5		5		1															1
17	F	5		1		Acronym	4		1		Connections	5																	1		4.5		1															1
17	G	8		0		Acronym	4		1		Connections	4																	0.5		4		0															0
17	H	4		1		Acronym	4		0		Connections	4																	0.5		4		1															1
18	A			1		Acronym	1		0		Acronym																		0.5		1.5		0															0
18	B			1		Acronym	5		1		Acronym																		1		4		0															0
18	C			1		Acronym	3		1		Acronym																		1		3		1															1
18	D			1		Acronym	4		1		Acronym																		1		3.5		1															1
18	E			1		Acronym	3		1		Acronym																		1		3		1															1
19	A	10		1		Acronym	3		1		Acronym	3		1		Acronym			1		Acronym	3							1		3		0			1												0.5
19	B	3		1		Acronym	5		1		Acronym	5		0		Acronym			1		Acronym	5							0.75		5		1			1												1
19	C	10		1		Acronym	5		1		Acronym	5		1		Acronym			1		Acronym	5							1		5		1			1												1
19	D	3		1		Acronym	4		1		Acronym	4		1		Acronym			1		Acronym	4							1		4		1			1												1
19	E	4		1		Acronym	5		1		Acronym	5		1		Acronym			1		Acronym	5							1		5		0			0												0
19	F	1		1		Acronym	5		1		Acronym	5		1		Acronym			1		Acronym	5							1		5		1			1												1
19	G	4		1		Acronym	5		1		Acronym	5		1		Acronym			1		Acronym	5							1		5		1			1												1
19	H	0		1		Acronym	5		1		Acronym	5		1		Acronym			1		Acronym	4							1		4.5		1			1												1
19	I	1		1		Acronym	5		1		Acronym	5		1		Acronym			1		Acronym	4							1		4		1			1												1
20	A	4		1		Acronym	3		0		Acronym	3		1		Acronym	3		1		Acronym	3							0.75		3		0			0												0
20	B	4		1		Acronym	5		0		Acronym	4		0		Acronym	5		1		Acronym	5							0.5		4.75		0			1												0.5
20	C	2		1		Acronym	4		1		Acronym	5		1		Acronym	5		1		Acronym	5							1		4.75		0			1												0.5
20	D	0		1		Acronym	4		1		Acronym	2		1		Acronym	5		1		Acronym	4							1		3.75		0			1												0.5
20	E	0		1		Acronym	4		1		Acronym	4		0		Acronym	4		1		Acronym	4							0.75		4		0			1												0.5
20	F	3		0		Acronym	3		1		Acronym	3		0		Acronym	4		1		Acronym	4							0.5		3.5		1			0												0.5
20	G	2		0		Acronym	3		1		Acronym	3		1		Acronym	4		1		Acronym	3							0.75		3.25		0			0												0
20	H	5		1		Acronym	3		1		Acronym	3		1		Acronym	5		1		Acronym	5							1		4		1			1												1
20	I	0		1		Acronym	4		1		Acronym	4		1		Acronym	5		1		Acronym	5							1		4.5		1			1												1
21	A	6		1		Acronym	3		1		Acronym	3																	1		3.33333		1															1
21	B	5		1		Acronym	4		0		Acronym	2																	0.5		2.33333		1															1
21	C	10		1		Acronym	5		0		Acronym	5																	0.5		4.66667		0															0
21	D	3		0		Acronym	4		0		Acronym	3																	0		3.66667		0															0
21	E	0		1		Acronym	5		0		Acronym	5																	0.5		5		0															0
21	F	2		0		Acronym	5		0		Acronym	5																	0		5		1															1
21	G	4		1		Acronym	5		0		Acronym	4																	0.5		4.33333		1															1
21	H	4		1		Acronym	4		1		Acronym	4																	1		4		1															1
22	A	6		1		Associations			0		Acronym	4		1		Rhyme			0		Acronym	4		1		Acronym			0.6		4		1															1
22	B	0		1		Associations			0		Acronym	5		1		Rhyme			0		Acronym	3		1		Acronym			0.6		4.33333		1															1
22	C	4		0		Associations			0		Acronym	3		1		Rhyme			0		Acronym	3		0		Acronym			0.2		3.16667		1															1
22	D	5		1		Associations			1		Acronym	5		1		Rhyme			1		Acronym	4		1		Acronym			1		4.66667		1															1
22	E	4		1		Associations			1		Acronym	5		1		Rhyme			1		Acronym	3		1		Acronym			1		4		1															1
22	F	7		1		Associations			1		Acronym	3		1		Rhyme			0		Acronym	3		1		Acronym			0.8		3		1															1
22	G	2		1		Associations			0		Acronym	5		1		Rhyme			1		Acronym	3		1		Acronym			0.8		3.66667		1															1
22	H	12		1		Associations			0		Acronym	5		1		Rhyme			1		Acronym	5		1		Acronym			0.8		5		1															1
22	I	0		1		Associations			1		Acronym	4		1		Rhyme			0		Acronym	3		1		Acronym			0.8		3.5		1															1
22	J	4		1		Associations			0		Acronym	4		1		Rhyme			0		Acronym	4		1		Acronym			0.6		4.16667		1															1
23	A	5		1		Acronym	5		1		Associations	5		1															1		5
23	B	3		1		Acronym	3		1		Associations	3		1															1		3.75
23	C	5		1		Acronym	1		1		Associations	1		0															0.666667		2.5
23	D	5		1		Acronym	5		1		Associations	5		0															0.666667		4.5
23	E	3		1		Acronym	3		1		Associations	3		0															0.666667		3.5
23	F	3		1		Acronym	5		1		Associations	5		1															1		5
23	G	5		0		Acronym	5		1		Associations	5		1															0.666667		5
23	H	2		1		Acronym	4		1		Associations	5		0															0.666667		4.75
23	I	1		1		Acronym	5		1		Associations	5		0															0.666667		5
23	J	1		1		Acronym	5		1		Associations	5		1															1		5
23	K	3		1		Acronym	4		1		Associations	5		1															1		4.75
23	L	3		1		Acronym	5		1		Associations	5		1															1		4.25
23	M	5		1		Acronym	1		1		Associations	3		1															1		3.5
[truncated: 20 more columns]
